Title: WORK OF BREATHING AND RESPONSE TIMES DURING SIMV AND PRESSURE SUPPORT VENTILATION BY A MODIFIED PEDIATRIC VOLUME VENTILATOR

Authors: L. D. Martin, M.D., J. F. Rafferty, RRT, R. C. Wetzell, M.B., B.S., F. R. Gioia, M.D.

Affiliation: Department of Anesthesiology and Critical Care Medicine, The Johns Hopkins Medical Institutions, Baltimore, Maryland 21205

**Introduction.** Volume ventilation in synchronized intermittent mandatory ventilation (SIMV) mode with demand flow ventilators has been shown to impose significant work of breathing during inspiration.<sup>1</sup> A new mode of ventilation, pressure support ventilation (PSV) has been reported to improve ventilator-patient synchrony and decrease imposed work of breathing ( $W_{imp}$ ). Simple modifications of volume ventilators have been shown to enhance sensitivity and diminish the asynchrony.<sup>2</sup> The purpose of this study was to quantify the performance of a pediatric volume ventilator after several modifications designed to decrease  $W_{imp}$  and shorten response time ( $t_r$ ).

**Methods.** A test lung was used to quantify volume, pressure, and  $t_r$  for assisted ventilation.<sup>3</sup> Minimum withdrawal volume ( $V_{min}$ ) was defined as that volume of air which, when removed from the circuit, triggered the ventilator in 9 of 10 trials.  $V_{min}$  was determined by storing successively increasing volumes (0.5 ml increments) as a vacuum in a syringe and rapidly introducing the vacuum to the ventilator circuit. The ventilator circuit pressure was measured and recorded. Maximum negative pressure ( $P_{mneg}$ ) was defined as the peak negative pressure deflection.  $t_r$  was the time from the initiation of negative pressure to the attainment of 1 cm H<sub>2</sub>O positive pressure.  $W_{imp}$  required to trigger the ventilator was defined as the product of the  $V_{min}$  and  $P_{mneg}$ .

Seven Siemens Servo 900C ventilators were tested. Table 1 lists the 16 trial conditions tested on each ventilator by the manipulation of: 1) mode of ventilation (SIMV vs PSV), 2) caliber of ventilator circuit tubing (large vs small), 3) location of ventilator airway pressure transducer (distal vs proximal), and 4) ventilator trigger sensitivity (0 vs -2 cm H<sub>2</sub>O). Analysis of variance was used to compare  $W_{imp}$  and  $t_r$  under all 16 trial conditions. A Duncan multiple range test was used to determine if two means were significantly different ( $P < .05$ ).

**Results.** There was no difference in  $W_{imp}$  between SIMV and PSV (Table 2).  $W_{imp}$  was significantly increased by decreasing ventilator trigger sensitivity from 0 to -2 cm H<sub>2</sub>O except when small tubing and proximal airway pressure modifications were used. Small bore tubing and proximal pressure monitoring decreased  $W_{imp}$  only when trigger sensitivity was at -2 cm H<sub>2</sub>O.

Response times were shorter with PSV compared to SIMV. Proximal airway pressure monitoring significantly decreased  $t_r$  in all trials. Small bore tubing decreased  $t_r$  significantly only when trigger sensitivity was at -2 cm H<sub>2</sub>O. Ventilator trigger sensitivity made no difference in  $t_r$ .

**Discussion.** The efficiency of assisted ventilation depends on the ability of the ventilator to sense an inspiratory effort and respond with an adequate gas flow. Until a ventilator responds to

a patient's inspiratory efforts, it acts as an inspiratory obstruction and increases work of breathing. This becomes especially important in infants and small children who have higher respiratory rates with correspondingly limited inspiratory time which may result in patient-ventilator asynchrony. Increasing trigger sensitivity will decrease  $W_{imp}$  but frequently leads to automatic cycling when used clinically. Both smaller circuit tubing which is less compliant and has smaller volumes; and proximal airway pressure monitoring allow more rapid transmission of pressure waves with decreased  $W_{imp}$  and shorter  $t_r$ . Shorter  $t_r$  were found with PSV compared to SIMV, suggesting that this mode of ventilation may reduce asynchrony in children.

#### References.

1. Christopher KI, et al: Chest 87:625-630, 1985.
2. Bray JD, et al: Pediatr Res 16:346A, 1982.
3. Epstein RA: Anesth 34:321-326, 1971.

TABLE 1: TEST CONDITIONS

| Trial # | Mode of Vent. | Caliber of Tubing | Airway Press. Monitor | Tig. Sens. |
|---------|---------------|-------------------|-----------------------|------------|
| 1       | SIMV          | large             | distal                | 0          |
| 2       | PSV           | large             | distal                | 0          |
| 3       | SIMV          | small             | distal                | 0          |
| 4       | PSV           | small             | distal                | 0          |
| 5       | SIMV          | large             | proximal              | 0          |
| 6       | PSV           | large             | proximal              | 0          |
| 7       | SIMV          | small             | proximal              | 0          |
| 8       | PSV           | small             | proximal              | 0          |
| 9       | SIMV          | large             | distal                | -2         |
| 10      | PSV           | large             | distal                | -2         |
| 11      | SIMV          | small             | distal                | -2         |
| 12      | PSV           | small             | distal                | -2         |
| 13      | SIMV          | large             | proximal              | -2         |
| 14      | PSV           | large             | proximal              | -2         |
| 15      | SIMV          | small             | proximal              | -2         |
| 16      | PSV           | small             | proximal              | -2         |

TABLE 2: Mean work of breathing and response time

| Trial # | Imposed work of breathing (millijoules/liter) | Response Time (msec) |
|---------|-----------------------------------------------|----------------------|
| 1       | 0.20 ± 0.06                                   | 127 ± 5              |
| 2       | 0.19 ± 0.06                                   | 109 ± 4              |
| 3       | 0.42 ± 0.16                                   | 120 ± 9              |
| 4       | 0.43 ± 0.15                                   | 109 ± 9              |
| 5       | 0.08 ± 0.04                                   | 113 ± 11             |
| 6       | 0.07 ± 0.04                                   | 93 ± 8               |
| 7       | 0.04 ± 0.05                                   | 102 ± 7              |
| 8       | 0.04 ± 0.01                                   | 89 ± 7               |
| 9       | 4.86 ± 1.13                                   | 169 ± 23             |
| 10      | 4.52 ± 1.11                                   | 131 ± 20             |
| 11      | 1.86 ± 0.55                                   | 111 ± 7              |
| 12      | 2.46 ± 0.59                                   | 101 ± 5              |
| 13      | 2.58 ± 1.18                                   | 132 ± 21             |
| 14      | 2.54 ± 1.25                                   | 100 ± 11             |
| 15      | 0.39 ± 0.20                                   | 86 ± 6               |
| 16      | 0.21 ± 0.08                                   | 79 ± 5               |

Mean ± SEM
